# Supplementary material
Source: PubMed Central journal article supplement (PMC3351289)

**Goel et al.**  
**Supplementary Information**

**Fig. S1A**

(Related to Fig. 2A)

**Time-course of Wnt signaling activation in MEFs, after transfection with mWnt3a or mWnt1**

MEFs were plated and transfected with the Wnt reporter, superTOP-FLASH, along with a transfection control (renilla luciferase) and plasmids encoding mWnt3a or mWnt1, or a mock plasmid. Expression of the reporter was measured at the times indicated.

**Fig. S1B**

(Related to Fig. 2D)

**Dose response of canonical Wnt pathway activation in response to rmWnt3a**

MEFs were plated and transfected with Wnt reporter, superTOP-FLASH, along with a transfection control (renilla luciferase), as above. 24 hours later, cells were treated with the amounts of rmWnt3a indicated, and reporter activity was measured 16 hours later (and reported after normalizing to renilla expression)

Supp. Fig. 1A

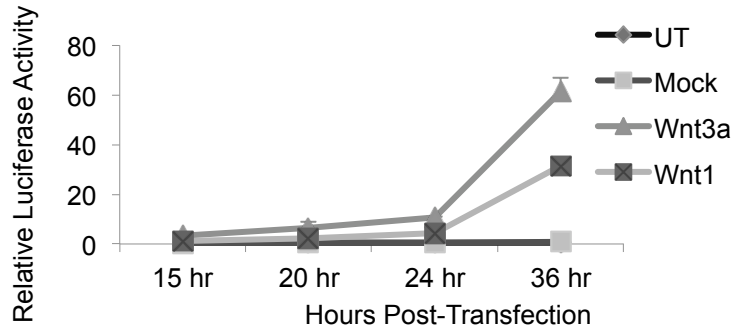

Supp. Fig. 1B

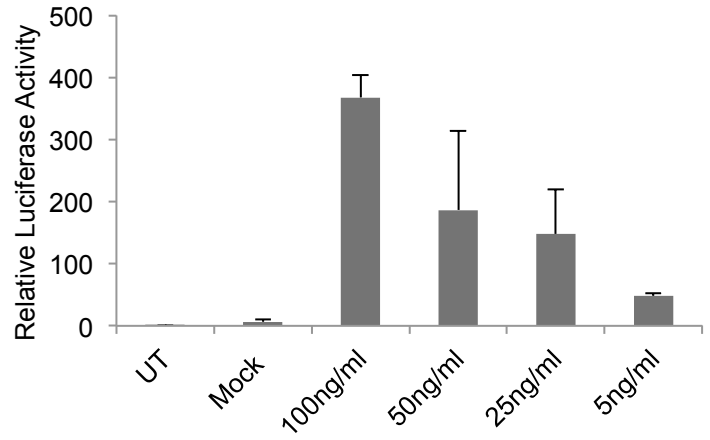

Supplement: supp_M112.362137_jbc.M112.362137-1.pdf [file supp_M112.362137_jbc.M112.362137-1.pdf]
